# Supplementary material for: Mutation analysis of Chinese sporadic congenital sideroblastic anemia by targeted capture sequencing
Source: Springer Nature journal article supplement (doi:10.1186/s13045-015-0154-0), 2015-05-18
Supplement: MOESM4 [file 9777460]

D

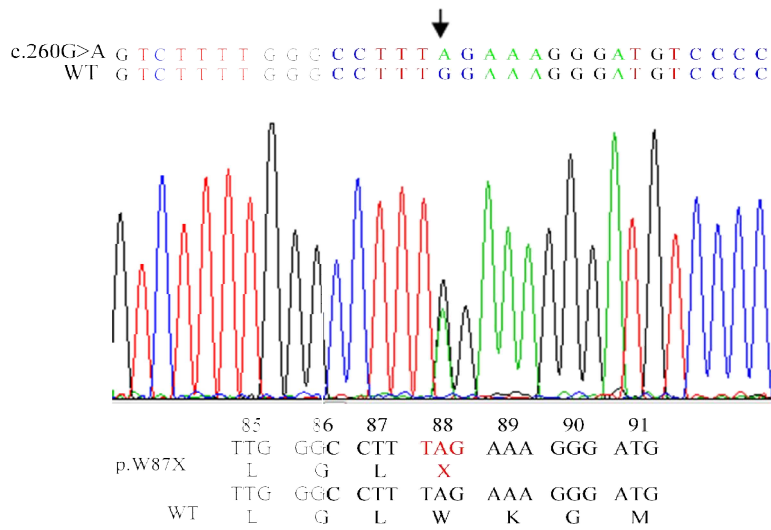

E

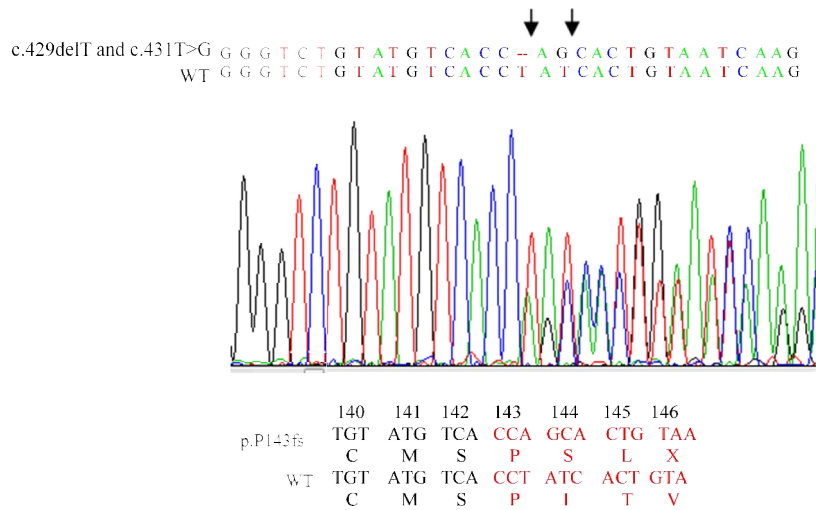

Additional file 4. Chromatograms of the mutations found in the patients, as confirmed by Sanger sequencing. (A) Homozygous missense mutation c.1412G>A of ALAS2 in Patient No. 3. (B) Homozygous missense mutation c.400C> T of SLC25A38 in Patient No. 4. (C) Homozygous mis-sense mutation c.560G>A of SLC25A38 in Patient No. 5. (D) Heterozygous nonsense mutation c.260G>A of SLC25A38 in Patient No. 6. (E) Heterozygous nonsense mutations c.429delT and c.431T>G of SLC25A38 in Patient No. 6.
